# Supplementary material
Source: PubMed Central journal article supplement (PMC6066300)
Supplement: supp_RA118.002568_136210_2_supp_140206_p8w101.pdf [file supp_RA118.002568_136210_2_supp_140206_p8w101.pdf]

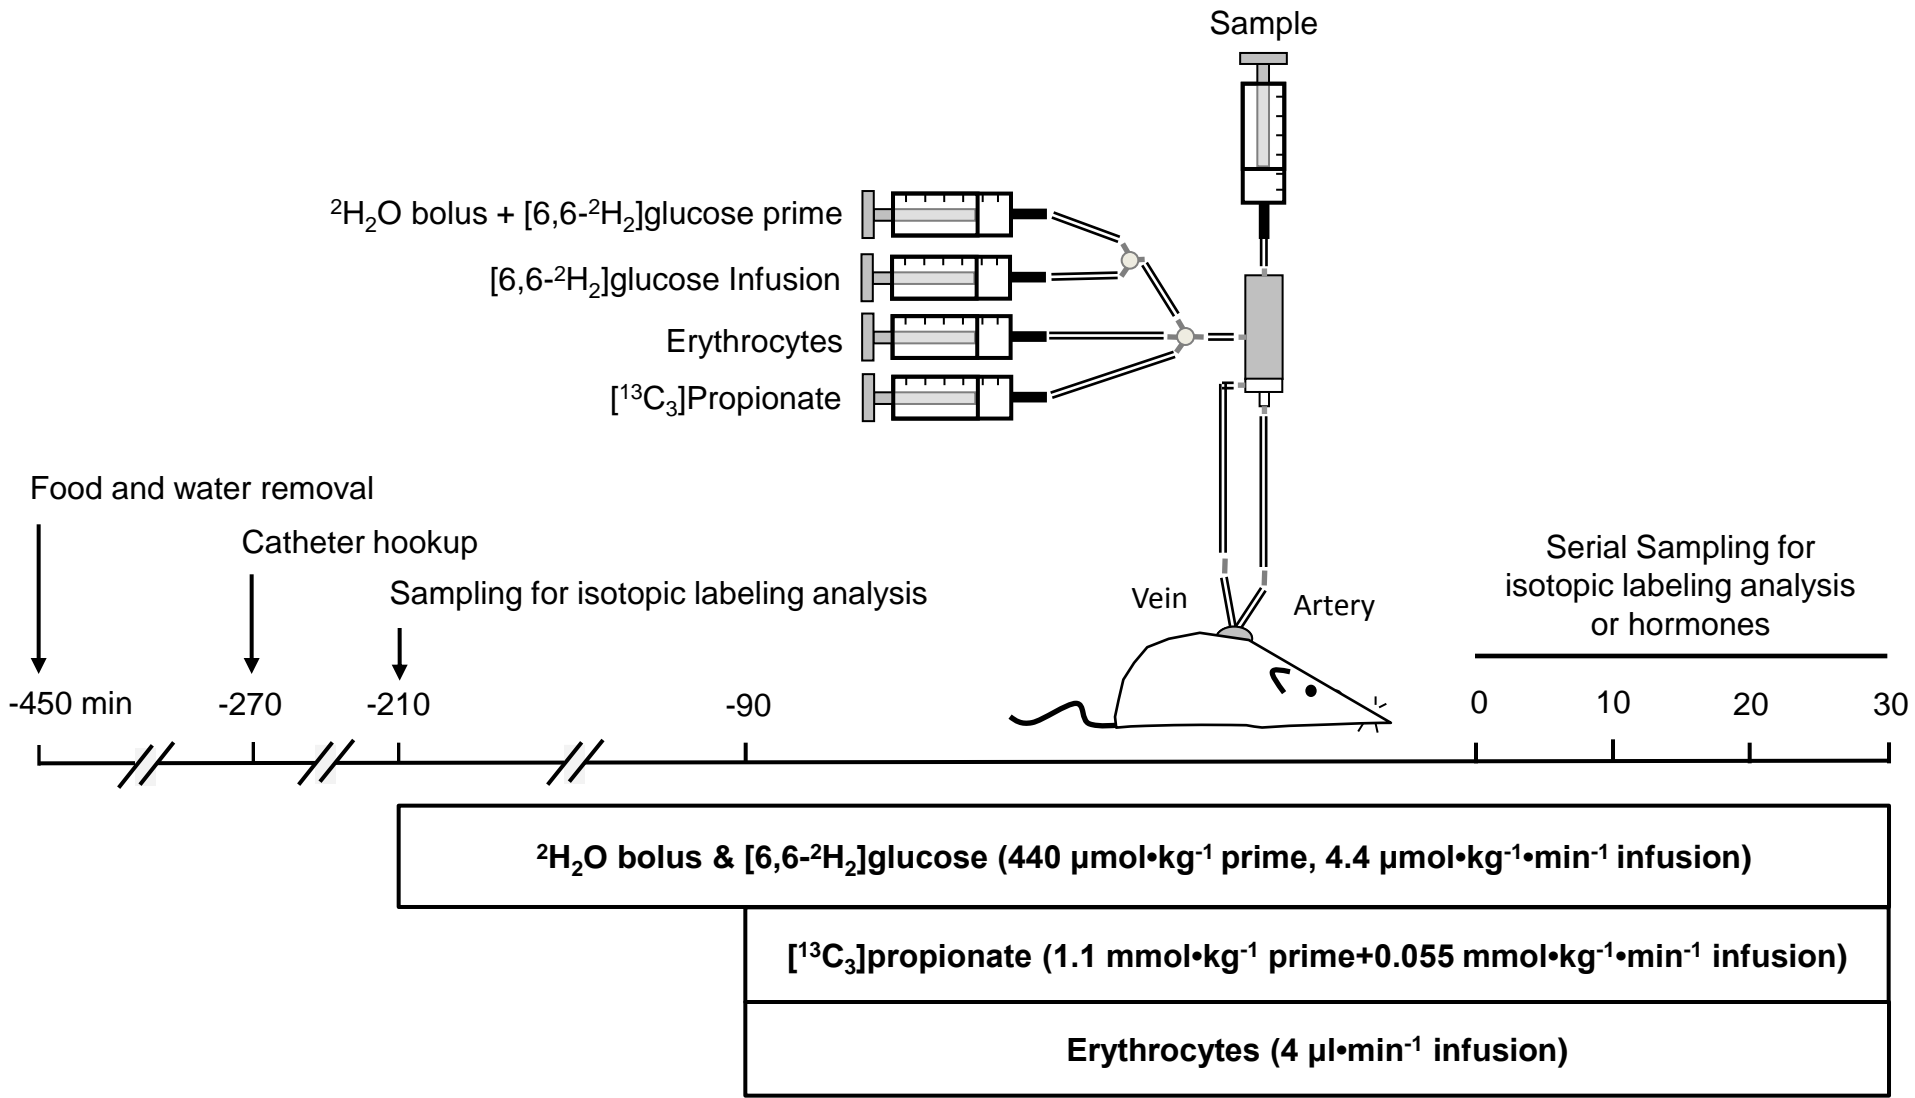

**FIGURE S1. Schematic representation of experimental procedures and timeline.** Stable isotope infusions were performed following seven days of recovery from arterial and jugular catheterization surgeries. At 210 minutes prior to sample acquisition for  $^2\text{H}/^{13}\text{C}$  metabolic flux analysis a  $^2\text{H}_2\text{O}$  bolus was administered into the venous circulation to enrich total body water at 4.5%. Simultaneously, a  $440 \mu\text{mol}\cdot\text{kg}^{-1}\cdot\text{min}^{-1}$   $[6,6\text{-}^2\text{H}_2]$ glucose prime was infused followed by a continuous  $4.4 \mu\text{mol}\cdot\text{kg}^{-1}\cdot\text{min}^{-1}$   $[6,6\text{-}^2\text{H}_2]$ glucose infusion. Ninety minutes prior to sampling, a  $1.1 \text{mmol}\cdot\text{kg}^{-1}\cdot\text{min}^{-1}$  prime and  $0.055 \text{mmol}\cdot\text{kg}^{-1}\cdot\text{min}^{-1}$  continuous infusion of  $[^{13}\text{C}_3]$ propionate was initiated. Donor erythrocytes were administered to prevent a decline in hematocrit. Arterial samples were obtained prior to stable isotope infusion as well as during 30-minute period 7.5-8 hours following food and water withdrawal for  $^2\text{H}/^{13}\text{C}$  metabolic flux analysis of hepatic intermediary metabolism.
