# Supplementary material
Source: PubMed Central journal article supplement (PMC6066300)
Supplement: supp_RA118.002568_136210_2_supp_140217_p8w102.pdf [file supp_RA118.002568_136210_2_supp_140217_p8w102.pdf]

|                                                         | WT                                | KO          |
|---------------------------------------------------------|-----------------------------------|-------------|
| <b>Total Phospholipids</b>                              | 19.4 ± 0.6                        | 14.5 ± 0.2* |
|                                                         | <b>Genotype Effect</b>            |             |
| <b>Phosphatidylethanolamine (PE) Metabolites</b>        | <b><math>\frac{KO}{WT}</math></b> |             |
| 1,2-dipalmitoyl-GPE (16:0/16:0) <sup>+</sup>            | 0.87                              |             |
| 1-palmitoyl-2-stearoyl-GPE (16:0/18:0) <sup>+</sup>     | 0.63*                             |             |
| 1-palmitoyl-2-oleoyl-GPE (16:0/18:1)                    | 0.72*                             |             |
| 1-palmitoyl-2-linoleoyl-GPE (16:0/18:2)                 | 0.18*                             |             |
| 1-palmitoyl-2-arachidonoyl-GPE (16:0/20:4) <sup>+</sup> | 0.55*                             |             |
| 1-stearoyl-2-oleoyl-GPE (18:0/18:1)                     | 1.04                              |             |
| 1-stearoyl-2-linoleoyl-GPE (18:0/18:2) <sup>+</sup>     | 0.43*                             |             |
| 1-oleoyl-2-linoleoyl-GPE (18:1/18:2) <sup>+</sup>       | 0.28*                             |             |
| 1,2-dilinoleoyl-GPE (18:2/18:2) <sup>+</sup>            | 0.30*                             |             |
| 1-stearoyl-2-arachidonoyl-GPE (18:0/20:4)               | 0.75*                             |             |
| 1-oleoyl-2-arachidonoyl-GPE (18:1/20:4) <sup>+</sup>    | 0.59*                             |             |
| 1-linoleoyl-2-arachidonoyl-GPE (18:2/20:4) <sup>+</sup> | 0.70*                             |             |
| <b>Phosphatidylcholine (PC) Metabolites</b>             |                                   |             |
| 1,2-dipalmitoyl-GPC (16:0/16:0)                         | 1.02                              |             |
| 1-palmitoyl-2-palmitoleoyl-GPC (16:0/16:1) <sup>+</sup> | 1.15                              |             |
| 1-palmitoyl-2-stearoyl-GPC (16:0/18:0)                  | 0.93                              |             |
| 1-palmitoyl-2-oleoyl-GPC (16:0/18:1)                    | 0.95                              |             |
| 1-palmitoyl-2-linoleoyl-GPC (16:0/18:2)                 | 0.67*                             |             |

|                                                                      |       |
|----------------------------------------------------------------------|-------|
| 1-palmitoyl-2-gamma-linolenoyl-GPC<br>(16:0/18:3n6) <sup>+</sup>     | 0.67* |
| 1-palmitoleoyl-2-linoleoyl-GPC<br>(16:1/18:2) <sup>+</sup>           | 1.09  |
| 1-palmitoyl-2-arachidonoyl-GPC<br>(16:0/20:4n6)                      | 0.91  |
| 1,2-distearoyl-GPC (18:0/18:0)                                       | 1.65* |
| 1-stearoyl-2-oleoyl-GPC (18:0/18:1)                                  | 1.67* |
| 1-stearoyl-2-linoleoyl-GPC (18:0/18:2) <sup>+</sup>                  | 1.10* |
| 1,2-dioleoyl-GPC (18:1/18:1)                                         | 3.11* |
| 1-oleoyl-2-linoleoyl-GPC (18:1/18:2) <sup>+</sup>                    | 2.13* |
| 1,2-dilinoleoyl-GPC (18:2/18:2)                                      | 0.70* |
| 1-linoleoyl-2-linolenoyl-GPC (18:2/18:3) <sup>+</sup>                | 0.28* |
| 1-stearoyl-2-arachidonoyl-GPC<br>(18:0/20:4)                         | 1.40* |
| 1-linoleoyl-2-arachidonoyl-GPC<br>(18:2/20:4n6) <sup>+</sup>         | 1.08  |
| <b>Diacylglycerol Metabolites</b>                                    |       |
| diacylglycerol (12:0/18:1, 14:0/16:1,<br>16:0/14:1) [2] <sup>+</sup> | 0.90  |
| diacylglycerol (14:0/18:1, 16:0/16:1) [1] <sup>+</sup>               | 3.55* |
| diacylglycerol (14:0/18:1, 16:0/16:1) [2] <sup>+</sup>               | 1.42* |
| diacylglycerol (16:1/18:2 [2], 16:0/18:3<br>[1]) <sup>+</sup>        | 1.35  |
| palmitoyl-palmitoyl-glycerol (16:0/16:0)<br>[1] <sup>+</sup>         | 2.81* |
| palmitoyl-palmitoyl-glycerol (16:0/16:0)<br>[2] <sup>+</sup>         | 0.94  |
| palmitoyl-oleoyl-glycerol (16:0/18:1) [1] <sup>+</sup>               | 2.36* |
| palmitoyl-oleoyl-glycerol (16:0/18:1) [2] <sup>+</sup>               | 1.23* |
| palmitoyl-linoleoyl-glycerol (16:0/18:2)<br>[1] <sup>+</sup>         | 1.00  |
| palmitoyl-linoleoyl-glycerol (16:0/18:2)<br>[2] <sup>+</sup>         | 0.76* |

|                                                                             |       |
|-----------------------------------------------------------------------------|-------|
| palmitoyl-linolenoyl-glycerol (16:0/18:3)<br>[2] <sup>+</sup>               | 0.99  |
| palmitoleoyl-linoleoyl-glycerol<br>(16:1/18:2) [1] <sup>+</sup>             | 1.61  |
| palmitoyl-dihomo-linolenoyl-glycerol<br>(16:0/20:3n3 or 6) [2] <sup>+</sup> | 1.40  |
| palmitoyl-arachidonoyl-glycerol<br>(16:0/20:4) [1] <sup>+</sup>             | 0.93  |
| palmitoyl-arachidonoyl-glycerol<br>(16:0/20:4) [2] <sup>+</sup>             | 1.15  |
| palmitoyl-docosahexaenoyl-glycerol<br>(16:0/22:6) [1] <sup>+</sup>          | 1.37* |
| palmitoyl-docosahexaenoyl-glycerol<br>(16:0/22:6) [2] <sup>+</sup>          | 2.05* |
| stearoyl-linoleoyl-glycerol (18:0/18:2)<br>[2] <sup>+</sup>                 | 1.01  |
| oleoyl-oleoyl-glycerol (18:1/18:1) [1] <sup>+</sup>                         | 5.20* |
| oleoyl-oleoyl-glycerol (18:1/18:1) [2] <sup>+</sup>                         | 2.43* |
| oleoyl-linoleoyl-glycerol (18:1/18:2) [1]                                   | 1.75* |
| oleoyl-linoleoyl-glycerol (18:1/18:2) [2]                                   | 1.36* |
| oleoyl-linolenoyl-glycerol (18:1/18:3) [2] <sup>+</sup>                     | 1.53  |
| linoleoyl-linoleoyl-glycerol (18:2/18:2)<br>[1] <sup>+</sup>                | 0.73* |
| linoleoyl-linoleoyl-glycerol (18:2/18:2)<br>[2] <sup>+</sup>                | 0.68* |
| linoleoyl-linolenoyl-glycerol (18:2/18:3)<br>[2] <sup>+</sup>               | 0.92  |
| stearoyl-arachidonoyl-glycerol (18:0/20:4)<br>[1] <sup>+</sup>              | 1.33  |
| stearoyl-arachidonoyl-glycerol (18:0/20:4)<br>[2] <sup>+</sup>              | 1.14  |
| oleoyl-arachidonoyl-glycerol (18:1/20:4)<br>[1] <sup>+</sup>                | 1.47  |
| oleoyl-arachidonoyl-glycerol (18:1/20:4)<br>[2] <sup>+</sup>                | 1.64* |
| linoleoyl-arachidonoyl-glycerol<br>(18:2/20:4) [1] <sup>+</sup>             | 1.44  |
| linoleoyl-arachidonoyl-glycerol<br>(18:2/20:4) [2] <sup>+</sup>             | 1.29  |
| stearoyl-docosahexaenoyl-glycerol<br>(18:0/22:6) [2] <sup>+</sup>           | 1.19* |

|                                                                    |       |
|--------------------------------------------------------------------|-------|
| linoleoyl-docosahexaenoyl-glycerol<br>(18:2/22:6) [2] <sup>+</sup> | 0.48* |
| <b>Ceramide Metabolites</b>                                        |       |
| ceramide (d18:1/14:0, d16:1/16:0) <sup>+</sup>                     | 1.19* |
| ceramide (d18:1/17:0, d17:1/18:0) <sup>+</sup>                     | 1.58* |
| ceramide (d18:1/20:0, d16:1/22:0,<br>d20:1/18:0) <sup>+</sup>      | 0.89  |
| ceramide (d18:2/24:1, d18:1/24:2) <sup>+</sup>                     | 1.49* |
| glycosyl ceramide (d18:2/24:1,<br>d18:1/24:2) <sup>+</sup>         | 1.79* |
| eicosanoylsphingosine (d20:1) <sup>+</sup>                         | 0.83  |
| <b>Sphingolipid Metabolites</b>                                    |       |
| palmitoyl dihydrosphingomyelin<br>(d18:0/16:0) <sup>+</sup>        | 0.79* |
| behenoyl dihydrosphingomyelin<br>(d18:0/22:0) <sup>+</sup>         | 0.28* |
| palmitoyl sphingomyelin (d18:1/16:0)                               | 0.80* |
| stearoyl sphingomyelin (d18:1/18:0)                                | 0.90  |
| behenoyl sphingomyelin (d18:1/22:0) <sup>+</sup>                   | 0.25* |
| tricosanoyl sphingomyelin (d18:1/23:0) <sup>+</sup>                | 0.64* |
| lignoceroyl sphingomyelin (d18:1/24:0)                             | 0.36* |
| sphingomyelin (d18:1/14:0, d16:1/16:0) <sup>+</sup>                | 0.51* |
| sphingomyelin (d17:1/16:0, d18:1/15:0,<br>d16:1/17:0) <sup>+</sup> | 0.38* |
| sphingomyelin (d18:2/16:0, d18:1/16:1) <sup>+</sup>                | 0.53* |
| sphingomyelin (d18:1/17:0, d17:1/18:0,<br>d19:1/16:0)              | 0.56* |
| sphingomyelin (d18:1/18:1, d18:2/18:0)                             | 0.74* |
| sphingomyelin (d18:1/20:0, d16:1/22:0) <sup>+</sup>                | 0.41* |
| sphingomyelin (d18:1/20:1, d18:2/20:0) <sup>+</sup>                | 0.45* |

|                                                                             |       |
|-----------------------------------------------------------------------------|-------|
| sphingomyelin (d18:1/21:0, d17:1/22:0, d16:1/23:0) <sup>+</sup>             | 0.17* |
| sphingomyelin (d18:1/22:1, d18:2/22:0, d16:1/24:1) <sup>+</sup>             | 0.21* |
| sphingomyelin (d18:2/23:0, d18:1/23:1, d17:1/24:1) <sup>+</sup>             | 0.29* |
| sphingomyelin (d18:1/24:1, d18:2/24:0) <sup>+</sup>                         | 0.68* |
| sphingomyelin (d18:2/24:1, d18:1/24:2) <sup>+</sup>                         | 0.47* |
| sphingomyelin (d18:2/23:1) <sup>+</sup>                                     | 0.26* |
| sphingomyelin (d18:2/21:0, d16:2/23:0) <sup>+</sup>                         | 0.12* |
| sphingomyelin (d18:1/25:0, d19:0/24:1, d20:1/23:0, d19:1/24:0) <sup>+</sup> | 0.23* |
| sphingomyelin (d18:1/22:2, d18:2/22:1, d16:1/24:2) <sup>+</sup>             | 0.22* |
| sphingomyelin (d18:0/20:0, d16:0/22:0) <sup>+</sup>                         | 0.34* |
| sphingomyelin (d18:0/18:0, d19:0/17:0) <sup>+</sup>                         | 0.54* |
| sphingomyelin (d18:1/19:0, d19:1/18:0) <sup>+</sup>                         | 0.33* |

**Table S1. Hepatic Phosphatidylethanolamine (PE), Phosphatidylcholine (PC),**

**Diacylglycerol, Ceramide, and Sphingolipid Metabolites.** Data are mean ± SEM for n = 8-9

mice per group. \*p<0.05 vs. wildtype (WT). <sup>+</sup>indicates compounds that have not been officially confirmed based on a standard.
